# Supplementary material
Source: Springer Nature journal article supplement (https://www.springermedizin.de/resource/supplementary/12875_2001_6_MOESM3_ESM.rtf/9436096)
Supplement: MOESM3 [file 9436096]

Extract 3 – Caribbean mothers in one session discussing action they would take (B and H are sisters, E is their cousin) 
B. If my child had that particular condition I would get the doctors out if I saw his chest moving like that and he is struggling, then I would be at the doctors, but I would ask my mum first
M. Ah ha you would ask your mum
H. Yeah we do [giggling]
B. I'll phone her and say "mum something is up" and she'll 
E. - advise you [with B at the same time]
B. - even if she's not there she'll say "if you can't cope then phone the doctors"
M. This is great
H. - and sometimes she would say "let me ask [name]" 
B. - or she'll get her books 
H. - as she says we've developed new ideas that she's not used to from her day		

See Additional file 1 for key to coding used in extract	
	
	
